# Supplementary material for: Paternal Uniparental Disomy of the Entire Chromosome 20 in a Child with Beckwith-Wiedemann Syndrome
Source: Genes (Basel). 2021 Jan 27;12(2):172. doi: 10.3390/genes12020172 (PMC7911624; doi:10.3390/genes12020172)
Supplement: Supplementary file 1 [file genes-12-00172-s001.xlsx]

## Sheet: ID
Supplementary Table S1: DNA methylation levels at imprinted loci
TargetID	Imprinted_DMR	CHR	Control_1	Control_2	Control_3	Control_4	Control_5	Control_6	Proband
cg00000924	KCNQ1OT1	11	0.52802	0.582917	0.56191	0.556954	0.591055	0.571267	0.190255
cg00059930	RB1	13	0.480987	0.55991	0.512186	0.533323	0.551119	0.535329	0.535943
cg00155882	KCNK9	8	0.500485	0.513555	0.500563	0.532903	0.512412	0.490385	0.505387
cg00237904	H19	11	0.585502	0.652418	0.577794	0.545821	0.5592	0.547708	0.528632
cg00267746	GNAS1A	20	0.444248	0.52063	0.412469	0.476329	0.497192	0.431251	0.0257282
cg00286878	MEST/MESTIT1	7	0.570629	0.632325	0.608771	0.630318	0.627818	0.60195	0.560838
cg00448707	DIRAS3	1	0.638779	0.659111	0.663652	0.67567	0.661363	0.643591	0.471743
cg00570518	IGF2 DMR2	11	0.522285	0.60075	0.524546	0.599507	0.611279	0.602874	0.527893
cg00576435	BLCAP	20	0.648191	0.712542	0.651599	0.673468	0.668745	0.653648	0.575922
cg00702231	PLAGL1/HYMAI	6	0.626824	0.687899	0.620728	0.670156	0.684852	0.640909	0.206662
cg00732970	NESP55	20	0.472766	0.534099	0.512815	0.501941	0.543382	0.508457	0.895853
cg00764369	DLK1/MEG3	14	0.782183	0.788097	0.775927	0.790793	0.848326	0.767668	0.756827
cg00765653	NESP55	20	0.599486	0.639058	0.590873	0.604737	0.621573	0.587824	0.978788
cg00766368	KCNK9	8	0.695145	0.756365	0.710686	0.773198	0.746716	0.788582	0.855758
cg00943909	GNASAS	20	0.423452	0.506908	0.468812	0.460199	0.456867	0.391322	0.00723155
cg00952145	NESP55	20	0.445616	0.457607	0.442227	0.469648	0.48444	0.437879	0.867934
cg01017090	GNASAS	20	0.503938	0.540969	0.508942	0.520885	0.53796	0.486213	0.0549355
cg01026744	NAP1L5	4	0.577527	0.596724	0.55896	0.625912	0.640542	0.589136	0.580876
cg01054891	ZIM2/PEG3	19	0.450529	0.52966	0.496315	0.517237	0.524777	0.465519	0.434368
cg01071811	L3MBTL	20	0.58633	0.597408	0.585696	0.669049	0.591846	0.625154	0.0614619
cg01169624	SGCE/PEG10	7	0.586614	0.65727	0.628045	0.650775	0.625855	0.627675	0.595452
cg01174175	NAP1L5	4	0.624941	0.646236	0.613353	0.637637	0.648037	0.61145	0.628815
cg01355739	NESP55	20	0.584292	0.622841	0.558067	0.619515	0.648866	0.601737	0.947036
cg01466133	BLCAP	20	0.67608	0.735579	0.72936	0.742615	0.724813	0.668392	0.641829
cg01538522	GNAS1A	20	0.440885	0.435262	0.406503	0.440915	0.452236	0.4251	0.0363566
cg01539474	H19	11	0.57829	0.646783	0.609152	0.604267	0.655209	0.60955	0.630521
cg01566785	SGCE/PEG10	7	0.536594	0.540215	0.539697	0.559539	0.563456	0.519038	0.548622
cg01570885	FAM50B	6	0.476227	0.569392	0.479527	0.534469	0.523804	0.516213	0.458221
cg01578057	NAP1L5	4	0.430208	0.491017	0.450321	0.505859	0.517145	0.470425	0.476515
cg01585333	H19	11	0.567504	0.588313	0.578453	0.579635	0.57162	0.574719	0.580562
cg01614564	SNRPN/SNURF	15	0.550651	0.586451	0.553729	0.609005	0.609996	0.570528	0.560455
cg01656470	ZIM2/PEG3	19	0.562556	0.641381	0.58331	0.616261	0.65384	0.631612	0.603453
cg01715551	GNASAS	20	0.48052	0.51549	0.453178	0.501839	0.53556	0.495089	0.112153
cg01744331	KCNQ1OT1	11	0.890001	0.944973	0.90578	0.945321	0.965809	0.929299	0.830808
cg01748573	GNAS1A	20	0.518817	0.621822	0.544876	0.592787	0.61731	0.557252	0.13744
cg01784351	MEST/MESTIT1	7	0.554801	0.569814	0.542525	0.539464	0.57299	0.536959	0.52385
cg01786704	SNRPN/SNURF	15	0.35167	0.579424	0.454827	0.441658	0.507433	0.536339	0.30282
cg01817393	GNASAS	20	0.348937	0.521014	0.4505	0.428553	0.457892	0.273418	0.0817024
cg01873334	KCNQ1OT1	11	0.668191	0.700565	0.653044	0.701071	0.708044	0.763903	0.279978
cg01877937	L3MBTL	20	0.52466	0.536629	0.509199	0.539235	0.563153	0.554401	0.034314
cg01893176	KCNQ1OT1	11	0.458085	0.487599	0.45831	0.492297	0.483125	0.469009	0.195488
cg01895612	H19	11	0.55486	0.614795	0.546431	0.555332	0.554165	0.545391	0.53835
cg01905633	FAM50B	6	0.462831	0.53386	0.422197	0.48915	0.495562	0.503692	0.278006
cg01977486	H19	11	0.636516	0.687442	0.641185	0.663559	0.69768	0.650649	0.659309
cg01989224	NDN	15	0.535119	0.604941	0.679822	0.712999	0.691645	0.629397	0.649083
cg02107718	GNAS1A	20	0.50921	0.543506	0.478469	0.547895	0.579026	0.554371	0.077531
cg02125271	SNRPN/SNURF	15	0.668147	0.720029	0.668331	0.759779	0.723666	0.716861	0.726395
cg02162069	ZIM2/PEG3	19	0.501215	0.551918	0.510103	0.53905	0.537035	0.519139	0.532698
cg02171545	SNRPN/SNURF	15	0.293244	0.329672	0.363836	0.43776	0.344199	0.394132	0.374224
cg02177317	L3MBTL	20	0.581417	0.623765	0.603639	0.636476	0.61029	0.62775	0.0366762
cg02219360	KCNQ1OT1	11	0.533537	0.585008	0.571086	0.511414	0.608321	0.566471	0.143773
cg02274728	NESP55	20	0.559886	0.648608	0.57309	0.605001	0.599615	0.532341	0.893435
cg02305723	SNRPN/SNURF	15	0.507323	0.570907	0.490967	0.512184	0.569608	0.560486	0.695026
cg02313552	DLK1/MEG3	14	0.709865	0.767505	0.680847	0.7216	0.744248	0.693758	0.797519
cg02317907	DIRAS3	1	0.698477	0.727282	0.658291	0.717232	0.698496	0.663202	0.312891
cg02472486	L3MBTL	20	0.553375	0.549067	0.547988	0.580755	0.606672	0.574835	0.031592
cg02478023	ZIM2/PEG3	19	0.604479	0.693455	0.596147	0.630132	0.644795	0.623054	0.615864
cg02501418	MEST/MESTIT1	7	0.572214	0.643293	0.607815	0.640879	0.631849	0.60619	0.590121
cg02611863	L3MBTL	20	0.585634	0.651684	0.606683	0.626683	0.617085	0.63331	0.0407974
cg02613624	IGF2 DMR2	11	0.610073	0.664192	0.584089	0.602418	0.657889	0.647221	0.667085
cg02657360	H19	11	0.516596	0.563111	0.470707	0.466499	0.477948	0.456898	0.425676
cg02694715	H19	11	0.574686	0.594512	0.591698	0.614127	0.610047	0.612929	0.609305
cg02722214	INPP5F	10	0.615117	0.763357	0.67349	0.668542	0.783211	0.568403	0.679914
cg02756856	MEST/MESTIT1	7	0.650486	0.762674	0.662318	0.683334	0.737829	0.653589	0.674572
cg02793099	ZIM2/PEG3	19	0.527259	0.554709	0.557207	0.567853	0.559534	0.543258	0.524903
cg02798157	KCNQ1OT1	11	0.519509	0.589574	0.547036	0.572624	0.549748	0.539629	0.19445
cg02857557	INPP5F	10	0.693963	0.772486	0.710518	0.747445	0.756576	0.678386	0.720648
cg02864690	H19	11	0.557783	0.578948	0.54731	0.58071	0.582412	0.555864	0.550632
cg02880119	ZNF597	16	0.594225	0.583167	0.722038	0.614631	0.744836	0.563803	0.548189
cg02886509	H19	11	0.613012	0.653815	0.567262	0.579347	0.568552	0.515673	0.535874
cg02888166	DLK1/MEG3	14	0.634176	0.662208	0.61938	0.636086	0.664382	0.637444	0.621534
cg02965180	SGCE/PEG10	7	0.583187	0.589526	0.586756	0.585636	0.593931	0.577068	0.594707
cg02982753	DLK1/MEG3	14	0.512748	0.579843	0.551256	0.561584	0.563434	0.54543	0.512351
cg03010274	GNASAS	20	0.426533	0.529821	0.477353	0.473091	0.492912	0.457213	0.129937
cg03014008	GNAS1A	20	0.494759	0.558115	0.502919	0.549262	0.572833	0.529357	0.0012721
cg03061677	BLCAP	20	0.617498	0.653101	0.641439	0.678048	0.6764	0.633898	0.548701
cg03104936	GRB10	7	0.631536	0.509882	0.578668	0.587625	0.57753	0.643354	0.579896
cg03202897	FAM50B	6	0.525119	0.550094	0.504937	0.554401	0.556206	0.527256	0.513
cg03330552	FAM50B	6	0.828589	0.880694	0.808282	0.79432	0.825918	0.811711	0.714342
cg03344105	GNASAS	20	0.542151	0.580569	0.568726	0.562484	0.597932	0.56564	0.0747417
cg03384175	SGCE/PEG10	7	0.556698	0.603112	0.539216	0.625533	0.60643	0.577886	0.6123
cg03401726	KCNQ1OT1	11	0.559872	0.566761	0.582217	0.575805	0.584709	0.547708	0.269181
cg03422070	KCNQ1OT1	11	0.535533	0.637284	0.585261	0.624788	0.627754	0.570868	0.12077
cg03428109	ZDBF2	2	0.643035	0.72326	0.68106	0.693656	0.72004	0.670715	0.710938
cg03436478	SGCE/PEG10	7	0.536584	0.546152	0.530361	0.568972	0.553997	0.552307	0.517236
cg03547757	GNASAS	20	0.725559	0.794465	0.769531	0.932971	0.818476	0.748542	0.697947
cg03562868	PLAGL1/HYMAI	6	0.640385	0.761212	0.642598	0.69079	0.736599	0.671563	0.508518
cg03588221	MEST/MESTIT1	7	0.607741	0.618128	0.59684	0.615697	0.638686	0.616848	0.535461
cg03615235	BLCAP	20	0.730086	0.79507	0.752485	0.766602	0.751533	0.73369	0.656952
cg03641225	DIRAS3	1	0.356984	0.369615	0.370826	0.391426	0.360671	0.378035	0.19868
cg03682823	SGCE/PEG10	7	0.488689	0.550983	0.528949	0.575014	0.565234	0.534841	0.518587
cg03803002	KCNK9	8	0.591086	0.607137	0.553288	0.628512	0.607488	0.592916	0.591074
cg03821543	GNAS1A	20	0.539859	0.550639	0.525567	0.567991	0.586173	0.547269	0.0284127
cg03837903	GNAS1A	20	0.556931	0.524707	0.525108	0.62032	0.619075	0.574465	0.0820083
cg03896694	ZNF597	16	0.499588	0.610897	0.542965	0.603326	0.701263	0.447439	0.549391
cg03908391	GNASAS	20	0.592667	0.720175	0.662924	0.643175	0.701969	0.544914	0.0782306
cg03933495	NAT15	16	0.393847	0.399754	0.418867	0.492375	0.473006	0.375834	0.295243
cg03954573	FAM50B	6	0.536448	0.591705	0.522265	0.596255	0.605054	0.561217	0.46476
cg04019914	GNAS1A	20	0.62663	0.712453	0.630546	0.699846	0.709783	0.717536	0.408309
cg04027059	ZNF597	16	0.638949	0.680755	0.680529	0.670493	0.665905	0.580182	0.636933
cg04088212	H19	11	0.672712	0.703587	0.677782	0.696506	0.696776	0.659773	0.665319
cg04132853	NESP55	20	0.575543	0.652802	0.565125	0.58668	0.637696	0.559776	0.897919
cg04257105	GNASAS	20	0.421846	0.561573	0.488022	0.468425	0.501261	0.377183	0.0456834
cg04303139	SGCE/PEG10	7	0.486339	0.533536	0.491153	0.530055	0.541458	0.509051	0.502982
cg04304932	DLK1/MEG3	14	0.585889	0.632546	0.599148	0.626648	0.642595	0.590821	0.610224
cg04344875	MEST/MESTIT1	7	0.618272	0.646828	0.606354	0.659907	0.682688	0.665767	0.629049
cg04359324	ZDBF2	2	0.678598	0.712981	0.665357	0.634852	0.665206	0.661253	0.628339
cg04366249	SGCE/PEG10	7	0.0684428	0.0502024	0.0451317	0.043079	0.0676465	0.0415489	0.024403
cg04447621	FAM50B	6	0.55908	0.622641	0.524395	0.578505	0.568654	0.580065	0.372228
cg04457481	GNASAS	20	0.504113	0.557018	0.476353	0.544701	0.54472	0.506359	0.0923444
cg04489586	BLCAP	20	0.683162	0.711047	0.688216	0.676806	0.714086	0.659003	0.583678
cg04521244	SGCE/PEG10	7	0.568707	0.612235	0.578283	0.60271	0.62178	0.591406	0.570904
cg04576764	DLK1/MEG3	14	0.612728	0.654496	0.613288	0.624952	0.659653	0.616885	0.631838
cg04634483	SGCE/PEG10	7	0.536926	0.578703	0.561363	0.586449	0.599012	0.572214	0.566558
cg04677683	GNASAS	20	0.506261	0.625664	0.529476	0.640707	0.561803	0.567813	0.127563
cg04678950	MEST/MESTIT1	7	0.521192	0.588149	0.545958	0.601946	0.638686	0.569875	0.541053
cg04779428	GNAS1A	20	0.621077	0.657921	0.600274	0.672546	0.702632	0.681084	0.40819
cg04786207	MEST/MESTIT1	7	0.604006	0.650957	0.592513	0.640547	0.67749	0.654197	0.596119
cg04810287	BLCAP	20	0.565588	0.595676	0.575887	0.608773	0.599587	0.555509	0.486637
cg04817190	H19	11	0.613937	0.68077	0.635473	0.646767	0.666784	0.621159	0.615441
cg04840930	PLAGL1/HYMAI	6	0.814961	0.884663	0.817744	0.837647	0.893727	0.854492	0.729208
cg04975775	H19	11	0.607466	0.642566	0.572907	0.590095	0.627093	0.572975	0.583654
cg04984575	L3MBTL	20	0.59778	0.573906	0.574426	0.575811	0.614183	0.584246	0.00723203
cg05065100	NAP1L5	4	0.535074	0.563927	0.520141	0.559369	0.570053	0.557443	0.529873
cg05096321	SGCE/PEG10	7	0.549824	0.554839	0.550937	0.5711	0.564326	0.541991	0.528425
cg05222671	MEST/MESTIT1	7	0.642192	0.804804	0.736779	0.723449	0.73111	0.660049	0.622773
cg05260959	MEST/MESTIT1	7	0.587264	0.661608	0.5947	0.616789	0.630397	0.663115	0.609769
cg05277165	SGCE/PEG10	7	0.494509	0.517179	0.513869	0.487825	0.510443	0.510966	0.526439
cg05309239	GNASAS	20	0.49956	0.517409	0.487817	0.544112	0.566327	0.536762	0.0118362
cg05326984	PLAGL1/HYMAI	6	0.526407	0.570924	0.515139	0.550253	0.567778	0.533864	0.107528
cg05369791	MEST/MESTIT1	7	0.483083	0.483065	0.486648	0.493405	0.539297	0.49442	0.442389
cg05384664	IGF2 DMR2	11	0.569531	0.676138	0.584802	0.639833	0.649548	0.660029	0.540207
cg05392265	DIRAS3	1	0.513611	0.532556	0.548817	0.531797	0.559775	0.52607	0.184371
cg05509218	SGCE/PEG10	7	0.579242	0.666369	0.610583	0.628716	0.62322	0.580331	0.583588
cg05556276	MEST/MESTIT1	7	0.561891	0.576715	0.563237	0.565232	0.591977	0.57788	0.570365
cg05558390	NESP55	20	0.367074	0.414645	0.371816	0.43183	0.42881	0.404523	0.976538
cg05711886	DLK1/MEG3	14	0.56518	0.614	0.585059	0.599258	0.582215	0.568837	0.553635
cg05740879	KCNQ1OT1	11	0.557489	0.637813	0.59556	0.636305	0.626394	0.587795	0.232694
cg05811173	FAM50B	6	0.549305	0.572332	0.547104	0.541133	0.574193	0.561774	0.533377
cg05816130	KCNQ1OT1	11	0.567296	0.578572	0.548337	0.582638	0.620647	0.564794	0.227007
cg05819130	SGCE/PEG10	7	0.596739	0.600553	0.5971	0.605528	0.618002	0.595608	0.594566
cg05862114	MEST/MESTIT1	7	0.574525	0.617131	0.559955	0.576674	0.597324	0.576252	0.535189
cg05926269	GNAS1A	20	0.683334	0.705604	0.674691	0.7342	0.751679	0.689805	0.00826439
cg05949203	DIRAS3	1	0.618821	0.623996	0.605611	0.631111	0.647005	0.630505	0.219242
cg05960039	GNAS1A	20	0.340718	0.407168	0.326672	0.343629	0.383374	0.403625	0.022144
cg05998930	GRB10	7	0.764305	0.662554	0.702343	0.686226	0.727591	0.79278	0.766721
cg06047881	GNAS1A	20	0.438592	0.457401	0.446909	0.454726	0.490431	0.462323	0.0597472
cg06065549	GNASAS	20	0.447613	0.520142	0.465301	0.463375	0.499951	0.408191	0.150415
cg06100421	MEST/MESTIT1	7	0.465746	0.540324	0.509213	0.526531	0.555567	0.508535	0.495087
cg06121207	NAT15	16	0.485461	0.547414	0.508966	0.519826	0.544604	0.521974	0.5643
cg06163629	NESP55	20	0.549469	0.543309	0.548023	0.555874	0.54287	0.513255	0.973337
cg06179486	BLCAP	20	0.838541	0.887518	0.867476	0.829998	0.85155	0.852022	0.812214
cg06191076	DIRAS3	1	0.525059	0.560053	0.583298	0.601643	0.59574	0.546626	0.203255
cg06198069	BLCAP/NNAT	20	0.968511	0.974002	0.967372	0.978469	0.978388	0.975843	0.969424
cg06200857	GNASAS	20	0.565879	0.584481	0.554667	0.566603	0.576229	0.678195	0.179538
cg06212135	MEST/MESTIT1	7	0.590461	0.654508	0.606914	0.656775	0.677077	0.640645	0.57327
cg06288089	KCNQ1OT1	11	0.495503	0.530153	0.522149	0.546288	0.550352	0.524519	0.153354
cg06324048	GNASAS	20	0.600374	0.634162	0.581457	0.55325	0.621042	0.539226	0.0819335
cg06410284	ZNF597	16	0.482209	0.509623	0.447929	0.506242	0.528428	0.436648	0.52296
cg06446163	L3MBTL	20	0.521937	0.582297	0.555877	0.556077	0.594033	0.551999	0.0670083
cg06617468	NAP1L5	4	0.600927	0.663685	0.615741	0.626251	0.657107	0.595481	0.630181
cg06652523	ZIM2/PEG3	19	0.56537	0.546512	0.573728	0.574256	0.591298	0.590315	0.53507
cg06674062	SGCE/PEG10	7	0.47318	0.480262	0.463915	0.506893	0.514074	0.459893	0.48672
cg06693667	GNASAS	20	0.535001	0.548497	0.538962	0.556704	0.563516	0.587205	0.15832
cg06695761	SGCE/PEG10	7	0.551441	0.587475	0.561753	0.590043	0.597409	0.58743	0.571763
cg06749854	H19	11	0.597842	0.652474	0.601946	0.631783	0.637551	0.636667	0.615253
cg06765785	H19	11	0.503554	0.57214	0.512726	0.558333	0.547941	0.545168	0.486342
cg06804177	MEG8	14	0.627767	0.645147	0.603827	0.649313	0.672068	0.622597	0.64337
cg07077459	PLAGL1/HYMAI	6	0.590335	0.601233	0.583241	0.615999	0.631264	0.581563	0.161368
cg07105596	GNASAS	20	0.415712	0.471723	0.440858	0.37008	0.504805	0.3625	0
cg07123182	KCNQ1OT1	11	0.954773	0.976623	0.935854	0.957109	0.978907	0.964726	0.922054
cg07156273	BLCAP	20	0.697086	0.736799	0.6976	0.733126	0.72125	0.705015	0.635812
cg07224147	MEST/MESTIT1	7	0.572838	0.623633	0.597252	0.637967	0.656473	0.609251	0.562172
cg07284407	GNASXL	20	0.564149	0.580646	0.539893	0.569445	0.586541	0.544295	0.0974588
cg07310951	ZIM2/PEG3	19	0.498287	0.574247	0.52225	0.511279	0.537944	0.524345	0.525951
cg07341934	GNAS1A	20	0.544529	0.592761	0.576145	0.596249	0.572091	0.587577	0.0591898
cg07360805	BLCAP	20	0.751025	0.833723	0.769222	0.7887	0.814195	0.736811	0.638032
cg07427065	MEST/MESTIT1	7	0.49663	0.564812	0.512787	0.512574	0.563806	0.53082	0.502399
cg07595203	KCNQ1OT1	11	0.399654	0.424861	0.409044	0.441129	0.49697	0.453878	0.122831
cg07678583	L3MBTL	20	0.836518	0.852228	0.803317	0.849261	0.875368	0.841155	0.643592
cg07870293	MEST/MESTIT1	7	0.54553	0.56197	0.530332	0.540196	0.557756	0.54043	0.497175
cg07878171	KCNK9	8	0.633801	0.649996	0.649907	0.637848	0.663424	0.653314	0.632524
cg07880715	RB1	13	0.670628	0.725419	0.655112	0.679623	0.679133	0.635053	0.668391
cg07898446	FAM50B	6	0.467929	0.488328	0.437057	0.491663	0.482147	0.473725	0.43168
cg07921535	SGCE/PEG10	7	0.388942	0.377554	0.298118	0.367593	0.422307	0.360969	0.342302
cg07947033	GNASAS	20	0.527788	0.561476	0.543907	0.538366	0.562946	0.628979	0.0653763
cg08091561	GNASAS	20	0.523056	0.569928	0.529711	0.556779	0.558113	0.675474	0.188937
cg08166863	GNASAS	20	0.58626	0.579942	0.546989	0.593971	0.582569	0.5712	0.109169
cg08229366	MEST/MESTIT1	7	0.54753	0.672183	0.625661	0.66733	0.649751	0.642656	0.579776
cg08263357	PLAGL1/HYMAI	6	0.541322	0.599631	0.531321	0.587514	0.657138	0.558051	0.198549
cg08291000	SGCE/PEG10	7	0.483915	0.528434	0.508744	0.529473	0.558133	0.514495	0.524566
cg08350488	IGF2R	6	0.529045	0.540319	0.496468	0.586114	0.535499	0.598862	0.517789
cg08359167	KCNQ1OT1	11	0.533928	0.52294	0.516034	0.510488	0.517563	0.519143	0.264843
cg08402058	BLCAP	20	0.622635	0.623241	0.636846	0.62235	0.646172	0.611133	0.560372
cg08446215	KCNQ1OT1	11	0.623554	0.635871	0.605776	0.639422	0.627652	0.604779	0.146897
cg08587534	GNASAS	20	0.51314	0.551375	0.545215	0.539308	0.546504	0.527262	0.063848
cg08626916	KCNK9	8	0.508297	0.610766	0.535738	0.554839	0.563731	0.554377	0.55384
cg08633313	L3MBTL	20	0.533356	0.556041	0.541485	0.583333	0.579221	0.546422	0.0507501
cg08698721	DLK1/MEG3	14	0.537162	0.701552	0.550123	0.626512	0.629876	0.669941	0.598717
cg08734637	MEST/MESTIT1	7	0.527347	0.518841	0.50868	0.517592	0.526387	0.515027	0.483516
cg08835688	DDC/GRB10	7	0.505807	0.561167	0.509108	0.518157	0.545029	0.522419	0.519261
cg08997444	GNAS1A	20	0.614498	0.657289	0.61797	0.653329	0.685163	0.619486	0.131552
cg09003373	MEST/MESTIT1	7	0.433022	0.490948	0.43183	0.497178	0.504717	0.464765	0.46692
cg09080913	MEST/MESTIT1	7	0.67165	0.683512	0.667079	0.677815	0.709072	0.657515	0.57859
cg09118625	DIRAS3	1	0.52548	0.517336	0.538999	0.523382	0.515192	0.506612	0.350718
cg09123158	GNASAS	20	0.667089	0.692524	0.652417	0.63973	0.714023	0.721035	0.654415
cg09150232	DDC/GRB10	7	0.76865	0.777421	0.792774	0.732928	0.747443	0.800445	0.760283
cg09280976	DLK1/MEG3	14	0.600275	0.664886	0.575902	0.630184	0.613205	0.599103	0.594281
cg09437522	GNASXL	20	0.457425	0.545752	0.461582	0.498439	0.526607	0.470801	0.0749224
cg09448460	ZDBF2	2	0.40046	0.49689	0.380383	0.461734	0.500593	0.445212	0.421227
cg09452478	H19	11	0.499461	0.554029	0.491144	0.522008	0.548765	0.516992	0.530131
cg09462536	MEST/MESTIT1	7	0.371699	0.396113	0.372092	0.411016	0.399192	0.394496
cg09512080	SGCE/PEG10	7	0.535683	0.563153	0.521184	0.572656	0.590212	0.578578	0.555824
cg09518720	KCNQ1OT1	11	0.660442	0.680904	0.670234	0.525406	0.639429	0.661696	0.288502
cg09541000	L3MBTL	20	0.621122	0.640903	0.630508	0.636987	0.662702	0.748126	0.0406537
cg09596866	ZNF597	16	0.404733	0.502238	0.405212	0.452872	0.4728	0.406323	0.433405
cg09604333	GNAS1A	20	0.484268	0.481991	0.460438	0.480818	0.484516	0.492602	0.0339589
cg09701145	H19	11	0.633468	0.655972	0.606507	0.638123	0.621223	0.58843	0.630275
cg09730369	PLAGL1/HYMAI	6	0.680178	0.7342	0.70151	0.708184	0.692558	0.696217	0.261466
cg09772382	GNAS1A	20	0.597836	0.628333	0.610691	0.623869	0.624479	0.585252	0.0223357
cg09821214	FAM50B	6	0.468835	0.509378	0.46822	0.52061	0.513835	0.492836	0.510952
cg09890341	SGCE/PEG10	7	0.575256	0.581053	0.542912	0.60645	0.593883	0.591173	0.584518
cg09910998	SGCE/PEG10	7	0.534278	0.589814	0.561847	0.559983	0.573933	0.547112	0.523968
cg09926418	DLK1/MEG3	14	0.567825	0.646832	0.575908	0.622506	0.622093	0.629004	0.61404
cg10007452	PLAGL1/HYMAI	6	0.491498	0.492307	0.478293	0.493288	0.502788	0.512772	0.269637
cg10011623	GNAS1A	20	0.495144	0.550754	0.458367	0.528677	0.547713	0.516335	0.0798463
cg10038185	DIRAS3	1	0.609201	0.662932	0.600469	0.638282	0.614538	0.622002	0.102277
cg10065153	DLK1/MEG3	14	0.638921	0.63981	0.628561	0.626211	0.636071	0.65445	0.619779
cg10105290	SGCE/PEG10	7	0.570327	0.594298	0.579762	0.578123	0.593802	0.574527	0.583575
cg10154633	H19	11	0.585092	0.654195	0.620316	0.640509	0.646329	0.617776	0.615042
cg10204755	ZIM2/PEG3	19	0.570551	0.641034	0.607795	0.621905	0.626422	0.602752	0.588851
cg10249538	MEST/MESTIT1	7	0.630488	0.700074	0.66162	0.726396	0.695136	0.685892	0.640277
cg10271763	SNRPN/SNURF	15	0.597521	0.560604	0.573201	0.632601	0.608674	0.596483	0.394567
cg10302550	GNASAS	20	0.467155	0.515053	0.471544	0.488704	0.499215	0.38623	0.052806
cg10360552	L3MBTL	20	0.550637	0.581174	0.568619	0.599008	0.58057		0.0467853
cg10406676	NAT15	16	0.493124	0.559591	0.503857	0.545919	0.570666	0.510937	0.397647
cg10468484	GNASXL	20	0.513739	0.558634	0.514638	0.51741	0.546096	0.515429	0.0314269
cg10473158	MEST/MESTIT1	7	0.59519	0.785941	0.694466	0.689521	0.726386	0.62636	0.605984
cg10482201	ZNF597	16	0.507558	0.547939	0.558471	0.568286	0.635798	0.489728	0.575861
cg10515315	DLK1/MEG3	14	0.541996	0.5684	0.535512	0.562797	0.548053	0.557023	0.541846
cg10540302	DLK1/MEG3	14	0.463649	0.536654	0.472742	0.489904	0.512427	0.500779	0.468395
cg10583266	ZDBF2	2	0.499419	0.543111	0.493833	0.492412	0.511566	0.528413	0.520835
cg10642330	BLCAP/NNAT	20	0.46444	0.452671	0.442199	0.473003	0.495846	0.426038	0.061239
cg10748817	GNAS1A	20	0.581892	0.585839	0.510261	0.545039	0.592404	0.50054	0.0975683
cg10767216	MEST/MESTIT1	7	0.557504	0.715305	0.662154	0.658844	0.631027	0.608764	0.518619
cg10943497	DLK1/MEG3	14	0.715086	0.739605	0.703748	0.746985	0.728177	0.709036	0.672747
cg10981598	BLCAP	20	0.582251	0.617325	0.587338	0.586281	0.581012	0.55093	0.524213
cg11174847	BLCAP/NNAT	20	0.605405	0.632444	0.62013	0.614099	0.628016	0.584486	0.386664
cg11175683	SGCE/PEG10	7	0.575138	0.621315	0.570974	0.584964	0.655201	0.590222	0.576482
cg11244758	GNAS1A	20	0.521698	0.534154	0.501777	0.547681	0.574076	0.521551	0.00521395
cg11252765	BLCAP/NNAT	20	0.987807	0.989662	0.986698	0.992549	0.993945	0.993159	0.992454
cg11265941	SNRPN/SNURF	15	0.478386	0.552922	0.536674	0.561714	0.524528	0.554178	0.566002
cg11272547	KCNQ1OT1	11	0.862611	0.88196	0.842953	0.899724	0.900143	0.864963	0.857569
cg11285807	GNASAS	20	0.472644	0.506615	0.490018	0.501708	0.52376	0.494946	0.154809
cg11297256	KCNQ1OT1	11	0.625061	0.600078	0.595327	0.649812	0.672615	0.613711	0.188488
cg11300971	NAP1L5	4	0.702051	0.733044	0.70789	0.717052	0.72182	0.698152	0.69374
cg11319028	L3MBTL	20	0.486311	0.512455	0.509143	0.543736	0.521184	0.593851	0.0899491
cg11357538	GNAS1A	20	0.519917	0.587053	0.518106	0.571146	0.584749	0.565012	0.101771
cg11480267	GNAS1A	20	0.565283	0.461995	0.489135	0.568801	0.581606	0.537458	0.0853165
cg11532302	PLAGL1/HYMAI	6	0.575147	0.598312	0.525396	0.583102	0.65857	0.565526	0.122122
cg11562309	SGCE/PEG10	7	0.49658	0.546822	0.532606	0.557744	0.557637	0.552104	0.530791
cg11589966	SGCE/PEG10	7	0.521912	0.541894	0.519528	0.541617	0.519852	0.517414	0.505697
cg11613559	INPP5F	10	0.712243	0.880263	0.761195	0.774001	0.838082	0.690443	0.766431
cg11666921	KCNQ1OT1	11	0.471113	0.479325	0.499988	0.510447	0.486624	0.472153	0.0840003
cg11669839	GNASAS	20	0.457348	0.48365	0.466049	0.472324	0.497991	0.502417	0.100525
cg11735853	H19	11	0.524697	0.532984	0.531739	0.556808	0.564977	0.538062	0.524976
cg11753499	H19	11	0.588546	0.611675	0.607496	0.58995	0.601915	0.596762	0.565199
cg11826663	SNRPN/SNURF	15	0.586472	0.594522	0.625952	0.589993	0.616581	0.586668	0.494017
cg11985632	SGCE/PEG10	7	0.606337	0.621475	0.577052	0.612366	0.641163	0.617417	0.642573
cg11993252	KCNQ1OT1	11	0.601729	0.621926	0.542432	0.598185	0.613513	0.585679	0.269589
cg11996914	NESP55	20	0.527822	0.583352	0.562589	0.555287	0.582738	0.540897	0.911124
cg12032885	ZIM2/PEG3	19	0.444123	0.502931	0.450641	0.481435	0.479543	0.467775	0.501557
cg12054318	NESP55	20	0.516477	0.562303	0.542509	0.547464	0.561133	0.540475	0.852981
cg12070022	MEST/MESTIT1	7	0.50866	0.722662	0.573747	0.551308	0.649417	0.548013	0.469208
cg12070746	DIRAS3	1	0.502117	0.516897	0.48067	0.499573	0.518734	0.493509	0.182788
cg12077660	KCNQ1OT1	11	0.537151	0.558003	0.523625	0.544345	0.55048	0.5363	0.295066
cg12205903	ZIM2/PEG3	19	0.479882	0.530007	0.484348	0.492497	0.530485	0.519865	0.497739
cg12321149	GNASAS	20	0.38561	0.518276	0.406083	0.452919	0.476471	0.333969	0.128616
cg12347392	MEST/MESTIT1	7	0.539163	0.6612	0.594302	0.561918	0.642104	0.636145	0.549547
cg12397924	SGCE/PEG10	7	0.424036	0.452028	0.413373	0.454905	0.430161	0.422428	0.42043
cg12433386	KCNQ1OT1	11	0.75961	0.864789	0.815944	0.838541	0.815234	0.708059	0.412855
cg12497786	FAM50B	6	0.637271	0.703642	0.610571	0.679561	0.664495	0.647776	0.328149
cg12532169	NDN	15	0.423337	0.462334	0.467994	0.448006	0.482681	0.4323	0.412809
cg12573482	GNASAS	20	0.518618	0.554127	0.470654	0.529827	0.561508	0.484754	0.0878534
cg12625139	IGF2R	6	0.649573	0.703843	0.622302	0.690658	0.720733	0.683837	0.692035
cg12699433	L3MBTL	20	0.531069	0.546968	0.505631	0.528625	0.56214	0.540989	0.0504667
cg12757684	PLAGL1/HYMAI	6	0.489293	0.535037	0.47688	0.502976	0.552257	0.495196	0.173387
cg12759554	NAP1L5	4	0.449102	0.520912	0.472528	0.500448	0.521419	0.492292	0.510041
cg12840312	FAM50B	6	0.597908	0.573438	0.521054	0.573463	0.539454	0.543692	0.38094
cg12862537	BLCAP	20	0.614468	0.671941	0.644446	0.691306	0.640342	0.612071	0.528946
cg12903171	DDC/GRB10	7	0.457045	0.517374	0.476993	0.516677	0.559472	0.46401	0.46868
cg12967319	DLK1/MEG3	14	0.514226	0.577748	0.53158	0.561045	0.571135	0.552458	0.540919
cg12986021	DIRAS3	1	0.547263	0.604905	0.523612	0.583267	0.57797	0.551769	0.331722
cg13073261	SNRPN/SNURF	15	0.480383	0.521659	0.540638	0.532096	0.555211	0.578653	0.476838
cg13099417	DIRAS3	1	0.586969	0.69542	0.683078	0.665905	0.625538	0.611773	0.568505
cg13101072	FAM50B	6	0.54188	0.593905	0.514264	0.546541	0.5769	0.541515	0.538639
cg13104298	MEST/MESTIT1	7	0.682138	0.663104	0.658088	0.679686	0.70604	0.66671	0.51041
cg13208159	DIRAS3	1	0.527329	0.559935	0.518356	0.566791	0.560495	0.566863	0.171028
cg13210239	H19	11	0.6095	0.581919	0.572067	0.549876	0.569502	0.571976	0.584103
cg13289019	FAM50B	6	0.405755	0.46148	0.391322	0.414243	0.414185	0.423801	0.36447
cg13369939	ZIM2/PEG3	19	0.651037	0.646705	0.624705	0.681285	0.695829	0.643725	0.677077
cg13374648	ZIM2/PEG3	19	0.477704	0.534616	0.542224	0.561036	0.548109	0.536512	0.53829
cg13431205	RB1	13	0.493891	0.557729	0.489838	0.536979	0.561576	0.500052	0.53584
cg13495693	SNRPN intragenic	15	0.479277	0.444006	0.466291	0.478236	0.487867	0.436278	0.418944
cg13581483	H19	11	0.568161		0.561149	0.561262	0.603391	0.553368	0.568631
cg13605615	DIRAS3	1	0.494445	0.528207	0.532137	0.518651	0.513807	0.556214	0.22581
cg13610072	NAP1L5	4	0.60345	0.638746	0.613551	0.662617	0.654825	0.640415	0.646839
cg13660372	SGCE/PEG10	7	0.510463	0.549283	0.489333	0.493257	0.517261	0.479197	0.503205
cg13697378	DIRAS3	1	0.487631	0.511109	0.502774	0.4896	0.518156	0.510863	0.347343
cg13708635	BLCAP/NNAT	20	0.537984	0.582921	0.548042	0.547828	0.576837	0.53067	0.474926
cg13713522	KCNK9	8	0.727259	0.765637	0.701027	0.754726	0.748909	0.756861	0.72724
cg13728472	GNASAS	20	0.435417	0.476178	0.409118	0.381382	0.479877	0.44107	0.0445775
cg13790727	BLCAP	20	0.720364	0.730714	0.751903	0.752743	0.763111	0.715606	0.700022
cg13797824	SGCE/PEG10	7	0.57072	0.593983	0.573722	0.590473	0.60765	0.565447	0.580976
cg13828758	NDN	15	0.534692	0.552419	0.504712	0.552525	0.556643	0.527206	0.537255
cg13917504	MEST/MESTIT1	7	0.55558	0.583483	0.550219	0.551272	0.569542	0.552506	0.53305
cg13960339	ZIM2/PEG3	19	0.560436	0.604034	0.556086	0.653571	0.623028	0.600284	0.60514
cg13986840	MEST/MESTIT1	7	0.522713	0.616524	0.539371	0.58487	0.552035	0.617859	0.53952
cg14034270	DLK1/MEG3	14	0.707024	0.817163	0.738564	0.774475	0.78619	0.699646	0.750551
cg14070323	DLK1/MEG3	14	0.678531	0.71749	0.633478	0.664048	0.702787	0.688693	0.691829
cg14088957	MEST/MESTIT1	7	0.405237	0.479237	0.438462	0.477419	0.469664	0.458671	0.452752
cg14119337	DLK1/MEG3	14	0.454777	0.520435	0.436919	0.454198	0.516012	0.503245	0.427865
cg14123427	DLK1/MEG3	14	0.456885	0.505217	0.478813	0.510789	0.517718	0.479433	0.483183
cg14161241	PLAGL1/HYMAI	6	0.54825	0.630423	0.594031	0.604746	0.602412	0.551054	0.210788
cg14176797	GNASAS	20	0.518029	0.540866	0.49039	0.533143	0.568998	0.513737	0.135002
cg14203179	GNASXL	20	0.541645	0.556892	0.543701	0.569277	0.568961	0.555134	0.0375584
cg14243741	KCNQ1OT1	11	0.598247	0.635388	0.564226	0.629662	0.640779	0.618023	0.246069
cg14245102	DLK1/MEG3	14	0.479497	0.521307	0.490493	0.481443	0.517927	0.497804	0.444902
cg14263118	GNAS1A	20	0.611403	0.637889	0.573357	0.62734	0.63703	0.604168	0.0963459
cg14306330	L3MBTL	20	0.466483	0.502764	0.477793	0.452421	0.508732	0.556537	0.0785482
cg14309385	GNASAS	20	0.54117	0.562058	0.536555	0.565229	0.577529	0.552295	0.0726499
cg14388858	SGCE/PEG10	7	0.0527554	0.0450408	0.0707833	0.0330544	0.0442876	0.0326645	0.0255479
cg14392746	KCNQ1OT1	11	0.507519	0.569518	0.505268	0.552634	0.571459	0.533224	0.191172
cg14469070	BLCAP	20	0.74357	0.766529	0.697823	0.784113	0.758147	0.744751	0.67392
cg14482474	GNASAS	20	0.557935	0.595709	0.579625	0.569825	0.601636	0.561677	0.26704
cg14564778	GNASAS	20	0.492299	0.578622	0.444367	0.478856	0.57222	0.382468	0.0340908
cg14584935	MEST/MESTIT1	7	0.483778	0.640654	0.561465	0.575026	0.613948	0.545968	0.542564
cg14597908	NESP55	20	0.516466	0.550994	0.501905	0.539413	0.565126	0.53744	0.923215
cg14654875	NAT15	16	0.522843	0.540378	0.486388	0.537051	0.549266	0.518467	0.400148
cg14660776	GNASAS	20	0.469786	0.522103	0.502336	0.51046	0.537474	0.49687	0.0797791
cg14728235	NESP55	20	0.594767	0.612978	0.589777	0.622104	0.626293	0.592752	0.992169
cg14765818	BLCAP	20	0.680565	0.694514	0.690956	0.712596	0.706835	0.671427	0.620635
cg14849423	ZIM2/PEG3	19	0.574591	0.614198	0.59396	0.638491	0.666725	0.609017	0.613969
cg14873490	SGCE/PEG10	7	0.512063	0.511712	0.511834	0.528183	0.554619	0.535005	0.497042
cg14952237	MEST/MESTIT1	7	0.606715	0.689188	0.636159	0.69441	0.637465	0.68698	0.641477
cg14958441	KCNQ1OT1	11	0.485075	0.499889	0.482444	0.475872	0.542807	0.481421	0.265434
cg15101633	DLK1/MEG3	14	0.51435	0.571536	0.536489	0.554469	0.581997	0.544111	0.537374
cg15160445	GNASAS	20	0.546896	0.678229	0.564612	0.686969	0.603527	0.62317	0.0848446
cg15222215	GNAS1A	20	0.569072	0.578338	0.531653	0.578066	0.604652	0.572237	0.0480185
cg15298722	SNRPN intragenic	15	0.275029	0.153331	0.177118	0.235423	0.217704	0.158457	0.134453
cg15302378	L3MBTL	20	0.669133	0.700118	0.681366	0.702748	0.744808	0.71999	0.055529
cg15330298	L3MBTL	20	0.624867	0.653223	0.603521	0.633138	0.634537	0.630951	0.0407046
cg15373285	DLK1/MEG3	14	0.504236	0.551907	0.5259	0.56628	0.592632	0.535361	0.545284
cg15382302	FAM50B	6	0.614926	0.818441	0.714714	0.656925	0.661762	0.659965	0.592667
cg15388309	L3MBTL	20	0.557394	0.58929	0.544371	0.569426	0.558385	0.580562	0.102902
cg15419911	DLK1/MEG3	14	0.623688	0.640259	0.620665	0.652105	0.631959	0.630579	0.650488
cg15473155	ZIM2/PEG3	19	0.598154	0.617262	0.632908	0.675097	0.626945	0.609938	0.627118
cg15473473	BLCAP	20	0.643527	0.660345	0.666871	0.686465	0.697945	0.669325	0.594983
cg15631127	GNASAS	20	0.525439	0.585153	0.533756	0.56369	0.598297	0.558306	0.17748
cg15651941	KCNQ1OT1	11	0.545649	0.592617	0.516645	0.551281	0.618583	0.553408	0.123558
cg15678121	ZIM2/PEG3	19	0.598943	0.656606	0.596487	0.633276	0.672926	0.631779	0.652757
cg15696408	SGCE/PEG10	7	0.24432	0.324959	0.283362	0.319944	0.345552	0.319662	0.282977
cg15777825	ZIM2/PEG3	19	0.525565	0.517708	0.514035	0.51226	0.537742	0.520482	0.499089
cg15886040	H19	11	0.658513	0.662362	0.611262	0.648853	0.668094	0.599896	0.615813
cg15922305	H19	11	0.670694	0.740264	0.670305	0.64542	0.712619	0.679493	0.660243
cg15991553	DLK1/MEG3	14	0.573514	0.602978	0.579762	0.623655	0.629984	0.610046	0.633656
cg16148134	DIRAS3	1	0.56284	0.539949	0.494599	0.550922	0.516243	0.584521	0.126191
cg16148270	DIRAS3	1	0.6318	0.618988	0.61578	0.636387	0.630288	0.64488	0.19393
cg16303279	H19	11	0.585891	0.61674	0.603174	0.602936	0.626907	0.589529	0.628954
cg16314899	DIRAS3	1	0.603582	0.62593	0.564829	0.645173	0.666694	0.633378	0.143435
cg16321029	SNRPN/SNURF	15	0.474823	0.508544	0.413849	0.437744	0.50698	0.517541	0.506578
cg16326421	BLCAP/NNAT	20	0.857779	0.900141	0.855433	0.859561	0.853071	0.855315	0.8438
cg16349612	DDC/GRB10	7	0.546578	0.655088	0.628136	0.612722	0.610403	0.605822	0.610025
cg16492735	SGCE/PEG10	7	0.578606	0.596668	0.573225	0.595411	0.615044	0.604935	0.593042
cg16556677	KCNQ1OT1	11	0.808409	0.882798	0.828387	0.883712	0.874839	0.832901	0.760594
cg16567044	DLK1/MEG3	14	0.506358	0.610884	0.495884	0.544081	0.518176	0.549164	0.520796
cg16574793	H19	11	0.591354	0.606177	0.578634	0.563894	0.587899	0.584348	0.56947
cg16648571	BLCAP	20	0.556598	0.613461	0.575782	0.571018	0.570701	0.557042	0.460196
cg16738180	DLK1/MEG3	14	0.581564	0.668548	0.579639	0.637022	0.609587	0.591954	0.567166
cg16739686	KCNQ1OT1	11	0.581151	0.577923	0.602763	0.581918	0.631123	0.565989	0.173834
cg16823958	MEST/MESTIT1	7	0.664308	0.676789	0.645262	0.659383	0.707241	0.681521	0.660172
cg16833551	GNASAS	20	0.673529	0.730777	0.678372	0.724503	0.762162	0.6906	0.159399
cg16862791	L3MBTL	20	0.506765	0.530584	0.557004	0.522137	0.554413	0.543736	0.0292079
cg16907934	FAM50B	6	0.629645	0.872755	0.793229	0.662621	0.672093	0.695234	0.63559
cg17079325	MEST/MESTIT1	7	0.575062	0.646738	0.584286	0.609367	0.65922	0.626372	0.596128
cg17091610	L3MBTL	20	0.514528	0.600616	0.531265	0.555929	0.562306	0.526419	0.212779
cg17334845	GNAS1A	20	0.495173	0.509954	0.4535	0.529544	0.534985	0.491357	0.0483225
cg17347253	MEST/MESTIT1	7	0.570399	0.712561	0.621906	0.622925	0.638697	0.5543	0.550379
cg17414107	GNASAS	20	0.474222	0.604884	0.521296	0.529578	0.602226	0.453311	0.0815687
cg17485265	FAM50B	6	0.631724	0.814948	0.754058	0.686271	0.675386	0.664115	0.604045
cg17580798	MEST/MESTIT1	7	0.612714	0.611461	0.586907	0.60063	0.639987	0.616853	0.569095
cg17635114	NAP1L5	4	0.501344	0.519371	0.494408	0.535298	0.529198	0.505841	0.503829
cg17643025	BLCAP	20	0.67297	0.749988	0.682172	0.736268	0.704316	0.717271	0.663777
cg17652507	GNAS1A	20	0.529049	0.577361	0.472072	0.592427	0.61661	0.538685	0.00850706
cg17663463	ZIM2/PEG3	19	0.590362	0.663296	0.565665	0.667771	0.663653	0.611334	0.650381
cg17696847	NESP55	20	0.530832	0.578026	0.531249	0.56931	0.579781	0.466882	0.876686
cg17739279	FAM50B	6	0.648924	0.726263	0.618325	0.689209	0.638833	0.643302	0.648699
cg17769238	H19	11	0.567333	0.600955	0.547845	0.575008	0.603462	0.565191	0.571987
cg17841572	GNASAS	20	0.484873	0.540314	0.482089	0.535776	0.531968	0.524457	0.0871986
cg17865602	PLAGL1/HYMAI	6	0.564838	0.628214	0.592891	0.611125	0.601519	0.580862	0.161717
cg17895149	PLAGL1/HYMAI	6	0.503348	0.600469	0.526006	0.563907	0.578361	0.513656	0.173535
cg17943391	DIRAS3	1	0.421471	0.467075	0.423583	0.446718	0.474711	0.436067	0.163796
cg17985533	H19	11	0.700713	0.805794	0.731048	0.736122	0.747343	0.733449	0.69001
cg18139769	SGCE/PEG10	7	0.529421	0.563729	0.535371	0.568772	0.571569	0.523743	0.554566
cg18160880	GNAS1A	20	0.663245	0.692446	0.640865	0.724903	0.718414	0.670498	0
cg18197332	FAM50B	6	0.603676	0.616844	0.545091	0.635865	0.61659	0.600203	0.348286
cg18224653	GNASAS	20	0.492771	0.557366	0.507673	0.522708	0.553859	0.519817	0.0260723
cg18362496	H19	11	0.46477	0.568704	0.509982	0.497166	0.522674	0.501319	0.467135
cg18433380	BLCAP	20	0.631988	0.700476	0.65719	0.71172	0.70272	0.636074	0.568079
cg18454954	H19	11	0.508235	0.535155	0.486347	0.511644	0.519057	0.495189	0.473226
cg18481241	RB1	13	0.478756	0.538749	0.498359	0.528564	0.505205	0.523079	0.516389
cg18487516	FAM50B	6	0.594749	0.616846	0.510878	0.599529	0.603306	0.579171	0.391443
cg18506672	SNRPN/SNURF	15	0.525769	0.564033	0.50303	0.5736	0.570872	0.572581	0.547537
cg18516833	ZIM2/PEG3	19	0.729793	0.740024	0.712424	0.779871	0.749208	0.727579	0.730824
cg18552939	NDN	15	0.315163	0.349212	0.309275	0.369902	0.383227	0.396466
cg18607468	NAP1L5	4	0.674721	0.672941	0.640099	0.663409	0.688418	0.646277	0.668469
cg18619398	NESP55	20	0.476433	0.533897	0.486283	0.513892	0.52632	0.501115	0.941052
cg18644235	ZIM2/PEG3	19	0.712147	0.73283	0.714455	0.719721	0.743243	0.775381	0.741987
cg18656763	FAM50B	6	0.481084	0.49076	0.44144	0.497119	0.440278	0.475431	0.408307
cg18668753	ZIM2/PEG3	19	0.588557	0.668615	0.602603	0.662242	0.658575	0.647771	0.630318
cg18706888	ZIM2/PEG3	19	0.582951	0.631925	0.592237	0.67047	0.560367	0.618293	0.592508
cg18772071	NAP1L5	4	0.536288	0.586129	0.478529	0.558837	0.542099	0.589817	0.566372
cg18872973	FAM50B	6	0.655364	0.74212	0.657903	0.737574	0.674222	0.742143	0.656223
cg18898992	SGCE/PEG10	7	0.574435	0.597619	0.578239	0.586184	0.599789	0.579762	0.577213
cg18911945	L3MBTL	20	0.550826	0.594762	0.528277	0.580769	0.569401	0.527852	0.0280335
cg18934293	MEST/MESTIT1	7	0.540895	0.626545	0.551535	0.564132	0.594769	0.605734	0.5745
cg18935491	GNASAS	20	0.609629	0.596602	0.604074	0.601201	0.629427	0.580981	0.0224944
cg18949315	NESP55	20	0.491149	0.576737	0.548497	0.584782	0.541296	0.564094	0.859758
cg18997188	GNAS1A	20	0.616041	0.681396	0.614948	0.66223	0.710854	0.690613	0.401703
cg19024989	H19	11	0.582698	0.622385	0.543628	0.607799	0.613763	0.610217	0.58197
cg19041006	ZIM2/PEG3	19	0.59513	0.636101	0.550125	0.649544	0.639457	0.588754	0.612544
cg19079047	SGCE/PEG10	7	0.427524	0.466192	0.398858	0.421786	0.473608	0.427483	0.411293
cg19098268	ZIM2/PEG3	19	0.557681	0.589952	0.535509	0.578758	0.611112	0.57185	0.596551
cg19107595	SGCE/PEG10	7	0.348148	0.355983	0.229011	0.280342	0.306811	0.215035	0.239488
cg19114595	DIRAS3	1	0.573138	0.667875	0.567116	0.61852	0.621677	0.589277	0.312033
cg19296354	NESP55	20	0.516054	0.605377	0.537069	0.18764	0.588146	0.561374	0.921144
cg19335327	ZIM2/PEG3	19	0.540389	0.57086	0.535345	0.556885	0.603075	0.543282	0.564374
cg19344806	MEST/MESTIT1	7	0.589575	0.637202	0.62157	0.634639	0.638732	0.620669	0.60449
cg19362611	FAM50B	6	0.551529	0.587133	0.534628	0.586727	0.614417	0.576628	0.531272
cg19366042	ZDBF2	2	0.668062	0.699257	0.632923	0.648522	0.645475	0.625071	0.602964
cg19386484	MEST/MESTIT1	7	0.607111	0.622772	0.55517	0.608649	0.633041	0.606895	0.543763
cg19589727	GNASAS	20	0.333666	0.447941	0.38603	0.381871	0.421764	0.313056	0.104627
cg19592829	GNASAS	20	0.487541	0.538754	0.512306	0.541834	0.564566	0.572833	0.224329
cg19640589	GNASAS	20	0.487866	0.587379	0.525259	0.528189	0.56731	0.462154	0.0343776
cg19642877	IGF2 DMR0	11	0.595876	0.601485	0.510909	0.602773	0.604305	0.567549	0.522537
cg19643803	DLK1/MEG3	14	0.525625	0.575904	0.525872	0.557845	0.567375	0.553042	0.542372
cg19663555	SGCE/PEG10	7	0.557178	0.600006	0.563189	0.593332	0.617395	0.578897	0.559192
cg19694923	DIRAS3	1	0.49371	0.501485	0.51062	0.482295	0.555795	0.505582	0.127758
cg19771589	ZIM2/PEG3	19	0.524422	0.594199	0.500653	0.594558	0.587301	0.562868	0.550406
cg19782411	BLCAP	20	0.845833	0.910433	0.886132	0.837055	0.857515	0.837292	0.824657
cg19803984	SNRPN/SNURF	15	0.511074	0.499275	0.467186	0.483242	0.486505	0.512953	0.524222
cg19924104	SGCE/PEG10	7	0.451098	0.43957	0.425114	0.42248	0.494185	0.443337	0.415237
cg20008140	GNAS1A	20	0.570032	0.588918	0.526267	0.588334	0.618666	0.593284	0.220269
cg20018057	GNAS1A	20	0.433645	0.472554	0.44636	0.498326	0.489982	0.467127	0.0531441
cg20019489	NESP55	20	0.623423	0.782217	0.690053	0.679628	0.732581	0.616357	0.934649
cg20041873	SGCE/PEG10	7	0.543469	0.598712	0.536515	0.566593	0.581837	0.5597	0.589072
cg20050761	MEST/MESTIT1	7	0.497188	0.52048	0.485973	0.493798	0.536065	0.515064	0.466192
cg20091959	L3MBTL	20	0.557046	0.574446	0.540425	0.580919	0.582626	0.553995	0.170065
cg20126878	GNAS1A	20	0.512662	0.54251	0.492156	0.548571	0.550532	0.508853	0.0761953
cg20149168	DIRAS3	1	0.547762	0.571568	0.614838	0.573268	0.612021	0.550212	0.446147
cg20213508	GNAS1A	20	0.661837	0.689678	0.647534	0.71939	0.753027	0.749049	0.494237
cg20252111	L3MBTL	20	0.554129	0.580254	0.565934	0.595836	0.565016	0.543116	0.00722136
cg20297423	MEST/MESTIT1	7	0.437792	0.531183	0.495192	0.489303	0.518216	0.47051	0.471161
cg20365618	INPP5F	10	0.579116	0.683186	0.589872	0.581483	0.657004	0.592393	0.580901
cg20443501	PLAGL1/HYMAI	6	0.703714	0.804888	0.690816	0.700136	0.737193	0.723129	0.528027
cg20471298	ZDBF2	2	0.60048	0.663309	0.62562	0.612043	0.616179	0.623541	0.631154
cg20479660	BLCAP	20	0.650805	0.718498	0.666912	0.690228	0.686827	0.636514	0.579072
cg20528838	GNASAS	20	0.2705	0.401098	0.324767	0.324022	0.375883	0.261999	0.0366932
cg20529070	L3MBTL	20	0.557854	0.608416	0.554102	0.587367	0.624423	0.562546	0.0358505
cg20582984	NESP55	20	0.654489	0.676487	0.658594	0.666762	0.689485	0.66209	0.94844
cg20628335	ZIM2/PEG3	19	0.533254	0.568639	0.522073	0.554993	0.568083	0.54992	0.54875
cg20699737	KCNQ1OT1	11	0.548442	0.621838	0.545474	0.542221	0.615897	0.567312	0.179607
cg20707630	SNRPN intragenic	15	0.275768	0.261797	0.274255	0.372603	0.313731	0.255549	0.188521
cg20783699	BLCAP	20	0.67283	0.71381	0.695235	0.714843	0.709924	0.665577	0.630656
cg20826277	MEST/MESTIT1	7	0.502717	0.643647	0.553851	0.544901	0.582054	0.544734	0.507731
cg20897667	ZIM2/PEG3	19	0.550488	0.587312	0.538526	0.566532	0.563674	0.564119	0.578685
cg20952167	DLK1/MEG3	14	0.5413	0.557932	0.522741	0.525732	0.542748	0.505007	0.50623
cg21137515	KCNQ1OT1	11	0.564716	0.607352	0.560793	0.607908	0.602112	0.573354	0.20833
cg21153160	FAM50B	6	0.487522	0.531168	0.460041	0.483733	0.544476	0.51566	0.313544
cg21177626	FAM50B	6	0.414452	0.484095	0.378199	0.458602	0.438309	0.468775	0.269067
cg21200654	MEST/MESTIT1	7	0.61678	0.625056	0.587165	0.612937	0.646844	0.633706	0.598604
cg21330323	NESP55	20	0.512123	0.53246	0.518634	0.53298	0.519444	0.504695	0.869939
cg21588305	BLCAP	20	0.680299	0.745771	0.707727	0.71526	0.734004	0.698195	0.64164
cg21625881	GNASXL	20	0.566025	0.613265	0.593772	0.611755	0.624204	0.595616	0.0943057
cg21629528	MEST/MESTIT1	7	0.450451	0.498073	0.444234	0.453038	0.496592	0.483079	0.42269
cg21667116	MEST/MESTIT1	7	0.46897	0.545345	0.502912	0.525771	0.534408	0.516404	0.511621
cg21740964	FAM50B	6	0.533747	0.548232	0.49563	0.49487	0.558708	0.56817	0.429163
cg21771834	SGCE/PEG10	7	0.533332	0.564642	0.551292	0.583971	0.59218	0.584218	0.564213
cg21778340	SGCE/PEG10	7	0.53079	0.589127	0.563849	0.599535	0.575614	0.521566	0.551065
cg21808053	DIRAS3	1	0.482099	0.479667	0.482013	0.469206	0.477549	0.497459	0.280687
cg21853542	SGCE/PEG10	7	0.599659	0.645211	0.588768	0.614397	0.655695	0.635954	0.60992
cg21870668	SNRPN/SNURF	15	0.489067	0.600071	0.559964	0.520684	0.553471	0.510274	0.467773
cg21926091	KCNK9	8	0.672138	0.70409	0.667887	0.702507	0.733232	0.696967	0.693326
cg21938532	GNASAS	20	0.554791	0.579825	0.568434	0.582166	0.597455	0.589586	0.0399943
cg21952820	PLAGL1/HYMAI	6	0.575589	0.607868	0.397682	0.583182	0.714607	0.589002	0.176294
cg21988465	GNASXL	20	0.615604	0.626037	0.592458	0.634124	0.686077	0.627484	0
cg22159025	SNRPN/SNURF	15	0.585192	0.64264	0.541458	0.569052	0.626471	0.531607	0.614501
cg22290117	GNASAS	20	0.543746	0.644037	0.605412	0.602357	0.620056	0.572859	0.237613
cg22294267	ZIM2/PEG3	19	0.63998	0.671437	0.63558	0.660149	0.686052	0.63472	0.662496
cg22298088	BLCAP	20	0.719278	0.752042	0.752363	0.763006	0.734161	0.724138	0.706385
cg22330467	L3MBTL	20	0.599219	0.639283	0.576154	0.602765	0.587925	0.598326	0.076468
cg22331138	SGCE/PEG10	7	0.6098	0.627421	0.604494	0.600745	0.615477	0.592933	0.604443
cg22352234	PLAGL1/HYMAI	6	0.583401	0.58971	0.562734	0.581492	0.606802	0.597819	0.266642
cg22354595	ZIM2/PEG3	19	0.548369	0.596525	0.560973	0.585379	0.581879	0.564195	0.578702
cg22378065	PLAGL1/HYMAI	6	0.560894	0.608822	0.56719	0.588416	0.617486	0.585231	0.184066
cg22407822	GNAS1A	20	0.593981	0.604265	0.57897	0.60408	0.614331	0.59968	0.0254671
cg22421148	BLCAP	20	0.652119	0.717336	0.708292	0.717766	0.707564	0.671785	0.61102
cg22457903	L3MBTL	20	0.492	0.533659	0.495744	0.544557	0.530958	0.500023	0.233672
cg22491305	SNRPN/SNURF	15	0.773149	0.808174	0.797609	0.807438	0.787348	0.77247	0.729695
cg22500004	DIRAS3	1	0.545038	0.585868	0.553129	0.583485	0.607333	0.564154	0.218555
cg22502459	KCNK9	8	0.622795	0.644399	0.608467	0.619657	0.633351	0.594138	0.627837
cg22510412	BLCAP	20	0.685457	0.736406	0.699376	0.70179	0.713418	0.688737	0.63524
cg22551578	BLCAP	20	0.54358	0.631704	0.507901	0.56692	0.558048	0.515483	0.3902
cg22555495	SNRPN/SNURF	15	0.494441	0.519838	0.507291	0.513603	0.549792	0.493606	0.514988
cg22592140	MEST/MESTIT1	7	0.483896	0.50029	0.495462	0.50518	0.491198	0.499356	0.471185
cg22601123	L3MBTL	20	0.569284	0.58948	0.578504	0.608215	0.587158	0.609409	0.0649896
cg22639787	GNAS1A	20	0.726587	0.710917	0.670903	0.722871	0.738915	0.705431	0.143506
cg22649349	FAM50B	6	0.620178	0.798527	0.721425	0.698608	0.658085	0.660076	0.592589
cg22678136	SNRPN/SNURF	15	0.415185	0.456739	0.42097	0.44144	0.470624	0.446763	0.53407
cg22694067	NDN	15	0.369982	0.443687	0.422451	0.386191	0.440165	0.369562	0.313989
cg22705386	MEST/MESTIT1	7	0.608435	0.652393	0.603064	0.621329	0.619674	0.6304	0.58595
cg22741626	GNAS1A	20	0.686398	0.674323	0.636674	0.709844	0.715391	0.736415	0.480798
cg22807877	KCNK9	8	0.501546	0.526665	0.47151	0.546299	0.538115	0.50056	0.527848
cg22820921	SGCE/PEG10	7	0.391446	0.410028	0.379812	0.38677	0.429533	0.40543	0.368767
cg22860367	GNASAS	20	0.472323	0.520633	0.476494	0.491703	0.561045	0.475158	0.0850633
cg22901840	DIRAS3	1	0.520182	0.517228	0.533451	0.553438	0.535504	0.506065	0.294364
cg22924867	SGCE/PEG10	7	0.521694	0.568315	0.495322	0.560128	0.586809	0.544869	0.561457
cg22927979	ZIM2/PEG3	19	0.803983	0.75303	0.819162	0.752	0.760959	0.77093	0.784583
cg22940816	DLK1/MEG3	14	0.484621	0.515552	0.490534	0.515728	0.518011	0.5111	0.50214
cg22943498	BLCAP	20	0.685578	0.785	0.7344	0.75617	0.742414	0.705846	0.625689
cg22956483	IGF2 DMR2	11	0.314045	0.366741	0.343557	0.336851	0.346196	0.354937	0.365061
cg22989942	GNASAS	20	0.569278	0.568113	0.572239	0.582028	0.597004	0.602407	0.0301975
cg23156962	MEST/MESTIT1	7	0.449882	0.475871	0.455388	0.480027	0.471443	0.456518	0.4446
cg23159236	GNAS1A	20	0.37123	0.40616	0.34676	0.409522	0.448845	0.393646	0.00695925
cg23176399	DLK1/MEG3	14	0.496025	0.537634	0.506805	0.539754	0.541532	0.513813	0.542028
cg23249369	GNASAS	20	0.60599	0.67521	0.591646	0.64807	0.591263	0.61775	0.0138021
cg23312013	MEST/MESTIT1	7	0.491343	0.574461	0.523673	0.569325	0.56303	0.559519	0.512661
cg23342787	SGCE/PEG10	7	0.574656	0.617028	0.598857	0.624936	0.61323	0.606538	0.570731
cg23460430	PLAGL1/HYMAI	6	0.548585	0.633242	0.597191	0.60778	0.681248	0.582849	0.470526
cg23476401	H19	11	0.615099	0.706841	0.627142	0.621636	0.640357	0.596015	0.556336
cg23496597	GNAS1A	20	0.558483	0.575331	0.529824	0.601603	0.607192	0.589595	0.0500079
cg23566503	BLCAP/NNAT	20	0.444912	0.506194	0.448658	0.457162	0.512111	0.436691	0.22989
cg23605670	BLCAP	20	0.602782	0.627517	0.597265	0.652105	0.621184	0.588449	0.521767
cg23626798	L3MBTL	20	0.530348	0.549087	0.540747	0.554613	0.569211	0.551428	0.200083
cg23714917	MEST/MESTIT1	7	0.637091	0.648495	0.628586	0.643871	0.656084	0.653754	0.595094
cg23742152	DDC/GRB10	7	0.545758	0.588567	0.538691	0.579655	0.573595	0.6009	0.54843
cg23757721	BLCAP	20	0.708185	0.763742	0.720266	0.733477	0.745889	0.721557	0.630903
cg23835083	FAM50B	6	0.536177	0.610057	0.529637	0.586152	0.594386	0.571757	0.386564
cg23870378	DLK1/MEG3	14	0.501863	0.58399	0.520624	0.563021	0.572724	0.50649	0.536592
cg23954636	NAP1L5	4	0.566647	0.578362	0.558183	0.559716	0.568811	0.525768	0.565087
cg24089209	DLK1/MEG3	14	0.564858	0.622545	0.540254	0.604769	0.623976	0.562565	0.589337
cg24203465	GNASAS	20	0.511585	0.526567	0.532916	0.547573	0.577493	0.57324	0.0672858
cg24333473	ZNF597	16	0.315054	0.416484	0.356603	0.359774	0.453976	0.252933	0.319334
cg24343973	L3MBTL	20	0.753797	0.779875	0.675995	0.812636	0.809539	0.775312	0.355216
cg24409677	H19	11	0.599203	0.650045	0.634979	0.629897	0.651613	0.624946	0.633853
cg24510613	H19	11	0.572355	0.616731	0.54151	0.567444	0.592842	0.561525	0.556417
cg24605090	H19	11	0.533881	0.64788	0.545692	0.540353	0.567173	0.53467	0.503028
cg24675557	BLCAP	20	0.659559	0.681314	0.673765	0.718879	0.711168	0.625034	0.577392
cg24762053	BLCAP	20	0.757092	0.814373	0.793597	0.815814	0.83578	0.793911	0.743621
cg24785225	SNRPN/SNURF	15	0.622548	0.641308	0.590007	0.6668	0.638148	0.604492	0.59426
cg24844423	ZIM2/PEG3	19	0.587914	0.64938	0.603371	0.593777	0.637672	0.603881	0.64353
cg24871743	DIRAS3	1	0.588059	0.643008	0.630672	0.626227	0.636504	0.605193	0.498339
cg24885794	SGCE/PEG10	7	0.443133	0.48177	0.462959	0.494344	0.502514	0.483807	0.507346
cg24941047	MEST/MESTIT1	7	0.695703	0.820218	0.703109	0.746521	0.770622	0.681723	0.733295
cg24975842	NESP55	20	0.506214	0.541321	0.484077	0.512048	0.549083	0.485965	0.990496
cg24977055	DDC/GRB10	7	0.539502	0.591238	0.536305	0.585094	0.56104	0.545784	0.537893
cg25045785	INPP5F	10	0.681062	0.777745	0.693162	0.729148	0.7956	0.741333	0.675093
cg25073793	FAM50B	6	0.493982	0.532051	0.465555	0.51183	0.53524	0.495771	0.417829
cg25090051	NESP55	20	0.523106	0.616074	0.545349	0.558431	0.577346	0.484179	0.865166
cg25195497	FAM50B	6	0.554235	0.604192	0.521234	0.515966	0.557935	0.587897	0.46526
cg25204743	KCNQ1OT1	11	0.599987	0.683654	0.636293	0.698	0.733741	0.648788	0.572064
cg25229306	GNASAS	20	0.552155	0.573437	0.543582	0.567142	0.61509	0.557312	0.178076
cg25268451	NESP55	20	0.547101	0.639478	0.598437	0.605673	0.628727	0.575585	0.940481
cg25281616	H19	11	0.578105	0.665684	0.580901	0.579533	0.604441	0.569719	0.572019
cg25289899	H19	11	0.571698	0.650141	0.534241	0.551876	0.570595	0.559652	0.569852
cg25306939	KCNQ1OT1	11	0.499	0.586546	0.54524	0.575114	0.584582	0.550419	0.137783
cg25308079	GNAS1A	20	0.543583	0.550109	0.528815	0.561154	0.562552	0.533685	0.124483
cg25326570	GNASAS	20	0.52525	0.655689	0.505624	0.632266	0.611858	0.561907	0.110725
cg25350411	PLAGL1/HYMAI	6	0.500212	0.551118	0.529299	0.520983	0.533416	0.523062	0.110783
cg25407198	MEST/MESTIT1	7	0.567566	0.581549	0.55394	0.596692	0.606173	0.590245	0.563051
cg25437674	H19	11	0.477019	0.548136	0.489567	0.552585	0.536048	0.522098	0.481162
cg25458871	ZIM2/PEG3	19	0.520496	0.564243	0.546858	0.522482	0.601725	0.560674	0.524869
cg25519926	MEST/MESTIT1	7	0.603194	0.646934	0.606178	0.642542	0.652305	0.617542	0.616955
cg25535070	ZDBF2	2	0.693218	0.704684	0.703623	0.725539	0.721691	0.708301	0.71776
cg25579157	H19	11	0.555459	0.571363	0.549329	0.542769	0.5595	0.546385	0.563244
cg25652859	GNASAS	20	0.406963	0.515338	0.422642	0.433633	0.489005	0.321277	0.0751397
cg25676335	RB1	13	0.592076	0.673198	0.632908	0.669505	0.662934	0.652283	0.634172
cg25712981	BLCAP	20	0.739016	0.793351	0.769804	0.783222	0.773093	0.72455	0.66549
cg25755905	DIRAS3	1	0.443127	0.502575	0.470373	0.472278	0.506561	0.479371	0.153689
cg25821896	H19	11	0.577451	0.642095	0.555422	0.596837	0.642821	0.597786	0.579277
cg25836301	DLK1/MEG3	14	0.545528	0.590266	0.570602	0.594439	0.601136	0.558995	0.569716
cg25838645	H19	11	0.607529	0.59088	0.591431	0.580907	0.637698	0.607301	0.572874
cg25962605	BLCAP	20	0.55271	0.613653	0.572646	0.605522	0.59664	0.535625	0.44023
cg25978208	SNRPN/SNURF	15	0.464433	0.532692	0.454643	0.56609	0.448181	0.443408	0.463343
cg26083330	BLCAP	20	0.739166	0.748022	0.760374	0.744306	0.748031	0.730904	0.664796
cg26094482	KCNQ1OT1	11		0.483113	0.451504	0.458429	0.479678	0.423365	0.102255
cg26102503	GNASAS	20	0.515554	0.572078	0.518758	0.544582	0.583233	0.54037	0.052949
cg26104781	KCNQ1OT1	11	0.618249	0.652968	0.617858	0.658215	0.670339	0.578928	0.184081
cg26211800	FAM50B	6	0.699186	0.883304	0.855058	0.734548	0.749793	0.745187	0.660664
cg26275543	MEST/MESTIT1	7	0.547606	0.636926	0.581396	0.596195	0.622606	0.578358	0.510457
cg26374305	DLK1/MEG3	14	0.484714	0.644333	0.58293	0.576624	0.625049	0.610783	0.551363
cg26401390	IGF2 DMR2	11	0.508795	0.585402	0.525538	0.521612	0.547901	0.554177	0.498224
cg26469586	H19	11	0.467571	0.534857	0.493398	0.540229	0.564028	0.517847	0.506603
cg26496204	GNASAS	20	0.520171	0.589932	0.560522	0.572239	0.621457	0.507117	0.134396
cg26503018	SGCE/PEG10	7	0.580982	0.576105	0.549634	0.561611	0.595745	0.551041	0.552034
cg26532638	DIRAS3	1	0.896807	0.925639	0.902849	0.887933	0.912488	0.903482	0.91522
cg26534489	GNASAS	20	0.416549	0.490201	0.476921	0.456692	0.462184	0.416856	0.129852
cg26547719	KCNQ1OT1	11	0.535609	0.527625	0.545013	0.503867	0.515419	0.520896	0.228729
cg26708559	MEST/MESTIT1	7	0.522113	0.582415	0.527329	0.58556	0.591446	0.55303	0.448208
cg26708976	SNRPN intragenic	15	0.403743	0.394341	0.408208	0.440623	0.426219	0.383497	0.435613
cg26725891	NDN	15	0.521789	0.595283	0.54011	0.563702	0.567342	0.535317	0.408321
cg26740195	RB1	13	0.510651	0.589312	0.514482	0.54407	0.570932	0.536508	0.524131
cg26767990	GNAS1A	20	0.476282	0.50448	0.457675	0.461733	0.499872	0.484615	0.144844
cg26791489	GNAS1A	20	0.635132	0.652256	0.606157	0.674593	0.666688	0.666297	0.390566
cg26811638	GNASAS	20	0.378345	0.515258	0.449523	0.391062	0.483078	0.356751	0.0586422
cg26875073	SNRPN/SNURF	15	0.586241	0.64299	0.616041	0.6373	0.629523	0.62625	0.593403
cg26908876	KCNQ1OT1	11	0.45814	0.506161	0.469185	0.499446	0.463771	0.458562	0.0673677
cg26917367	ZIM2/PEG3	19	0.661655	0.743661	0.689084	0.674038	0.713244	0.700265	0.72059
cg26918062	NAT15	16	0.403212	0.460884	0.434813	0.482782	0.494963	0.399275	0.495729
cg26963277	KCNQ1OT1	11	0.917144	0.940956	0.902983	0.951236	0.951748	0.924193	0.886956
cg26997085	SGCE/PEG10	7	0.468679	0.516401	0.475915	0.533544	0.536152	0.504658	0.483523
cg27001184	SGCE/PEG10	7	0.575229	0.592342	0.580225	0.621396	0.624373	0.599763	0.583666
cg27026713	RB1	13	0.549375	0.631619	0.578999	0.598921	0.60938	0.601342	0.631043
cg27027803	GNAS1A	20	0.577457	0.603026	0.563801	0.621811	0.640456	0.569377	0.0638801
cg27119222	KCNQ1OT1	11	0.616191	0.650631	0.62908	0.726536	0.674088	0.667184	0.16218
cg27120649	SGCE/PEG10	7	0.41545	0.496515	0.413994	0.431271	0.479208	0.463026	0.352561
cg27136643	NAT15	16	0.53964	0.56069	0.541473	0.56451	0.633658	0.486783	0.560564
cg27150681	NAP1L5	4	0.669243	0.706117	0.663093	0.673825	0.689918	0.660493	0.683057
cg27182551	RB1	13	0.693055	0.745684	0.629962	0.763489	0.758196	0.648019	0.731352
cg27216384	PLAGL1/HYMAI	6	0.463619	0.512337	0.485961	0.479134	0.504189	0.503259	0.147227
cg27230044	SGCE/PEG10	7	0.515335	0.546723	0.526835	0.535616	0.525696	0.565685	0.524319
cg27262796	GNASAS	20	0.58335	0.576632	0.580423	0.562097	0.589461	0.534041	0.109247
cg27300742	H19	11	0.571661	0.674616	0.596714	0.579148	0.623413	0.577085	0.565986
cg27304225	SNRPN/SNURF	15	0.54022	0.603753	0.570173	0.584571	0.592328	0.543968	0.520743
cg27304369	GNASAS	20	0.463252	0.501097	0.481583	0.493361	0.545739	0.464501	0.0128073
cg27338480	MEST/MESTIT1	7	0.602416	0.610229	0.615438	0.620539	0.640571	0.615051	0.562619
cg27393730	SGCE/PEG10	7	0.5787	0.590251	0.566167	0.599352	0.614076	0.596388	0.56578
cg27417677	MEST/MESTIT1	7	0.581148	0.623827	0.623359	0.651426	0.6404	0.618725	0.589165
cg27435646	SGCE/PEG10	7	0.576902	0.572626	0.555428	0.590139	0.580135	0.557271	0.551978
cg27445347	FAM50B	6	0.535673	0.579973	0.515381	0.558963	0.55277	0.532292	0.563516
cg27460547	NAT15	16	0.470106	0.536781	0.47139	0.522385	0.526873	0.467261	0.513724
cg27504782	SGCE/PEG10	7	0.126849	0.197123	0.15487	0.12659	0.130346	0.131177	0.164639
cg27519373	ZIM2/PEG3	19	0.66882	0.706861	0.678576	0.69636	0.722551	0.717404	0.716204
cg27545611	DIRAS3	1	0.527667	0.609471	0.571859	0.584036	0.517829	0.587603	0.189465
cg27589003	MEST/MESTIT1	7	0.401195	0.502375	0.441261	0.452044	0.490033	0.503572	0.399254
cg27604721	KCNQ1OT1	11	0.567499	0.705386	0.612321	0.636572	0.6466	0.581164	0.219234
cg27644292	SNRPN/SNURF	15	0.577359	0.672279	0.618378	0.593553	0.583895	0.771926	0.566424
cg27661264	GNASAS	20	0.335993	0.44448	0.358666	0.35783	0.412454	0.313874	0.0884892

## Sheet: Sheet1
CHR
11
13
8
11
20
7
1
11
20
6
20
14
20
8
20
20
20
4
19
20
7
4
20
20
20
11
7
6
4
11
15
19
20
11
20
7
15
20
11
20
11
11
6
11
15
20
15
19
15
20
11
20
15
14
1
20
19
7
20
11
11
11
10
7
19
11
10
11
16
11
14
7
14
20
20
20
7
6
6
20
7
11
11
2
7
20
6
7
20
1
7
8
20
20
16
20
16
6
20
16
11
20
20
7
14
7
2
7
6
20
20
7
14
7
20
7
20
7
20
11
6
11
20
4
7
7
7
7
20
6
7
11
1
7
7
20
14
11
6
11
7
7
20
1
20
7
20
20
7
16
20
20
1
20
20
7
11
20
16
20
4
19
7
20
7
11
11
14
6
20
11
20
7
20
19
20
20
7
11
20
7
8
13
6
7
20
20
20
7
6
7
6
11
20
11
20
8
20
14
7
7
20
7
7
1
20
7
14
20
2
11
7
7
11
20
16
20
11
6
20
6
7
7
14
6
20
1
14
7
11
19
7
15
20
20
16
20
7
16
14
14
2
20
20
7
14
20
20
7
20
20
15
11
20
11
4
20
20
20
6
7
7
10
11
20
11
11
15
7
11
20
19
20
7
1
11
19
20
7
7
11
6
15
20
6
20
6
4
6
20
7
14
1
15
1
6
7
1
11
6
19
19
13
15
11
1
4
7
1
20
8
20
20
7
15
7
19
7
14
14
7
14
14
6
20
20
11
14
20
20
20
7
11
20
20
20
7
20
16
20
20
20
19
7
7
11
14
20
20
15
20
20
14
6
20
14
19
20
20
11
19
7
19
11
11
14
1
1
11
1
15
20
7
7
11
14
11
20
14
11
7
20
20
6
7
20
20
7
20
6
7
4
20
20
19
20
6
11
20
6
6
1
11
7
20
6
20
11
20
11
13
6
15
19
15
4
20
19
6
19
19
4
6
7
20
7
20
20
20
11
19
7
19
7
1
20
19
7
6
2
7
20
20
20
11
14
7
1
19
20
15
7
20
20
20
7
7
20
20
1
20
20
7
10
6
2
20
20
20
20
19
11
15
20
7
19
14
11
6
6
7
20
20
20
7
7
6
7
7
1
7
15
8
20
6
20
15
20
19
20
20
7
6
19
6
20
20
20
15
1
8
20
20
15
7
20
20
6
15
15
7
20
8
7
20
1
7
19
14
20
11
20
7
20
14
20
7
7
6
11
20
20
20
20
7
7
20
6
14
4
14
20
16
20
11
11
11
20
20
15
19
1
7
7
20
7
10
6
20
6
11
20
20
11
11
11
20
20
6
7
11
19
7
2
11
20
13
20
1
11
14
11
20
15
20
11
20
11
6
7
14
11
11
20
7
1
20
11
7
15
15
13
20
20
20
15
11
19
16
11
7
7
13
20
11
7
16
4
13
6
7
20
11
15
20
7
7
7
7
6
16
7
19
1
7
11
15
20
